# Supplementary material for: Synergic effects of the decoration of nickel oxide nanoparticles on silicon for enhanced electrochemical performance in LIBs
Source: Royal Society of Chemistry journal article supplement (doi:10.1039/c9na00727j), 2020-01-01
Supplement: c9na00727j1.pdf [file c9na00727j1.pdf]

# Synergic Effect of Decoration of Nickel Oxide Nanoparticles on Silicon for Enhanced Electrochemical Performance in LIBs

*Ujjwala V Kawade,<sup>a</sup> Sunil R Kadam,<sup>b</sup> Milind V Kulkarni,<sup>\*a</sup> Bharat B Kale<sup>\*a</sup>*

<sup>a</sup> Centre for Materials for Electronics Technology (C-MET), Ministry of Electronics and Information Technology (MeitY), Panchavati, Pune 411008,

<sup>b</sup> Ben-Gurion University of the Negev, Department of Chemistry, Beer-Sheva, Israel

E-mail: [bbkale@cmet.gov.in](mailto:bbkale@cmet.gov.in), [milind@cmet.gov.in](mailto:milind@cmet.gov.in)

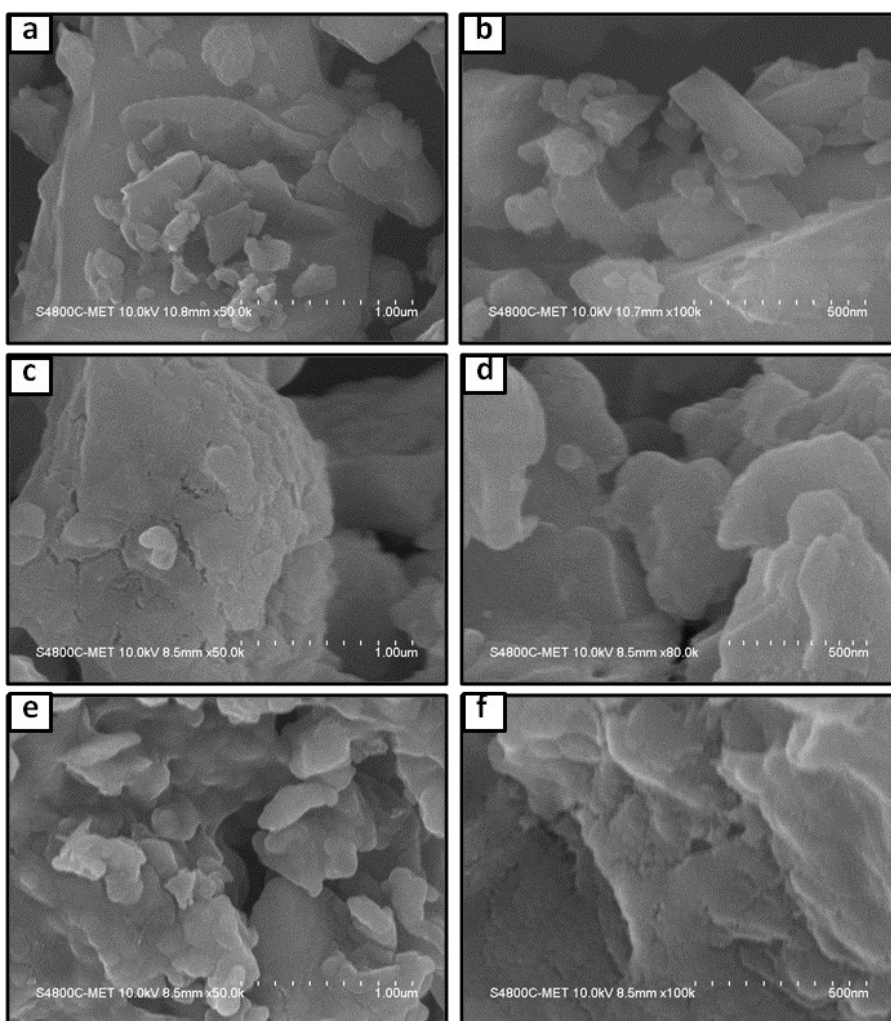

**Figure S1.** FESEM images of (a, b) Pristine Si, (c, d) SNO1 and (e, f) SNO3

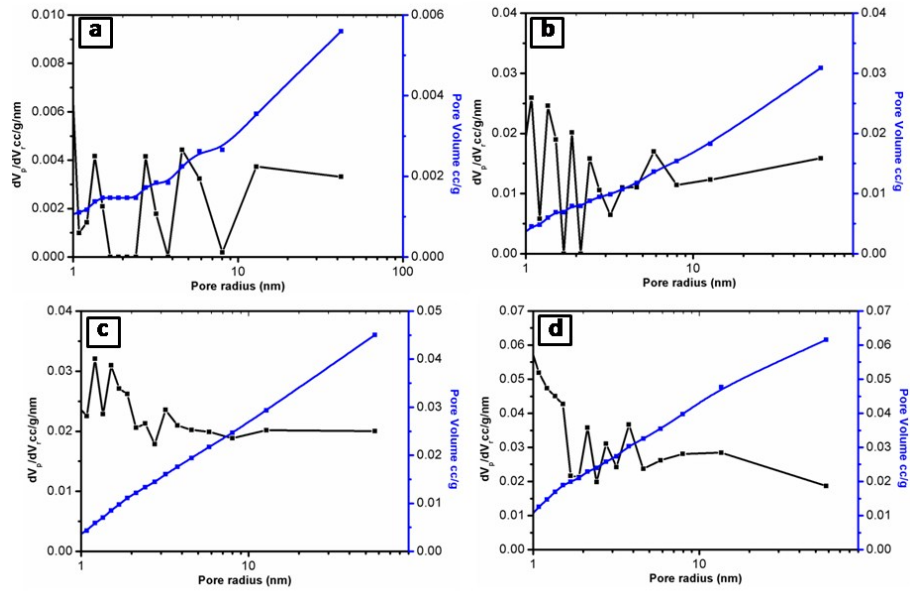

Figure S2. BJH pore size distribution plots of (a) pristine Si (b) SNO1 (c) SNO2 (d) SNO3

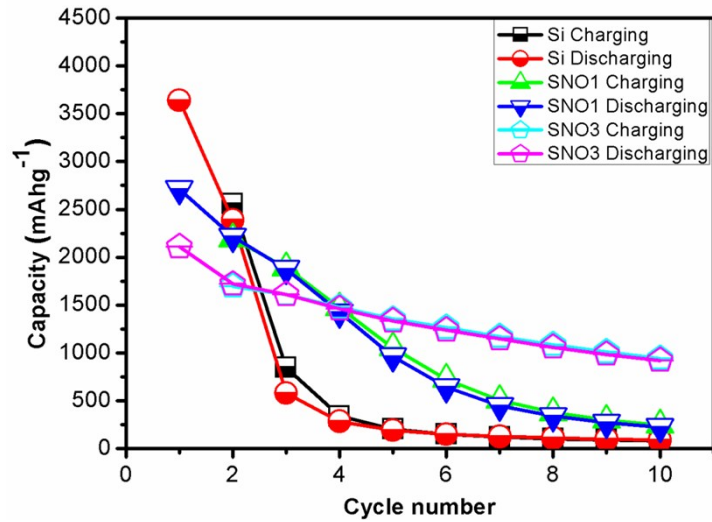

FigureS3: cycling performance of Pristine Si, SNO1 and SNO3 between 0.01 and 3V.

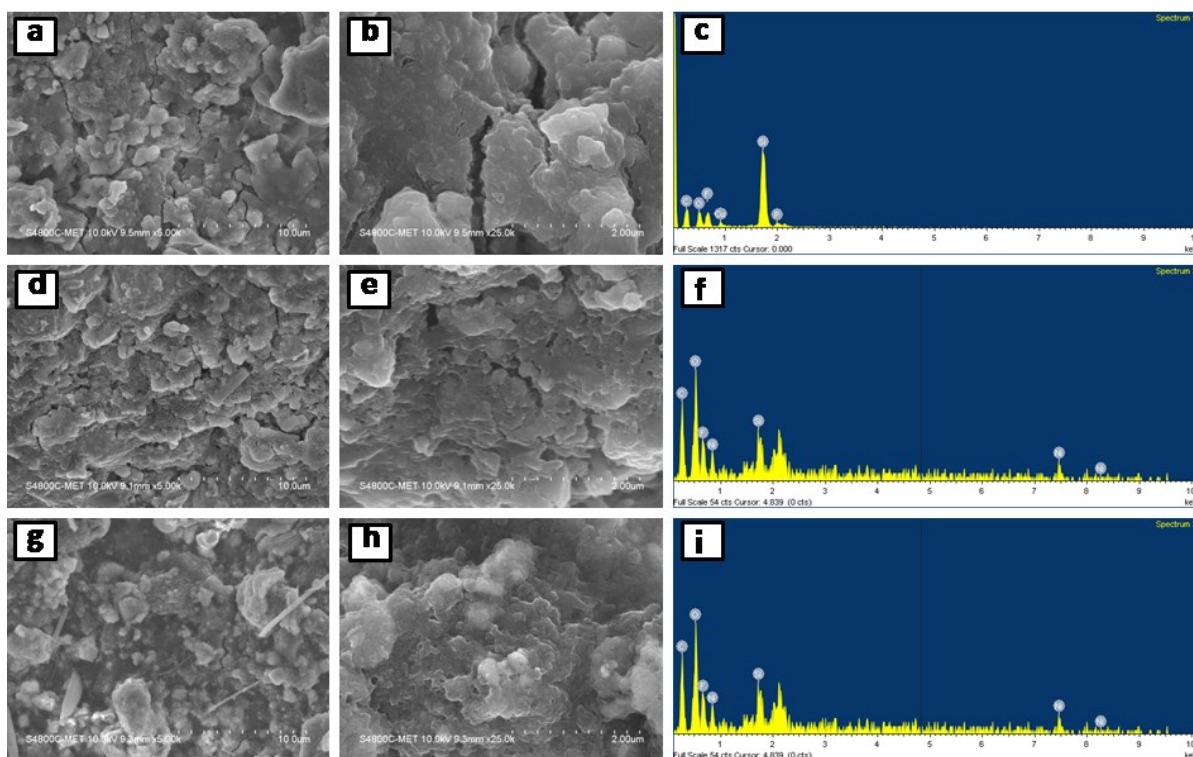

**Figure S4** FESEM-EDS spectrum of pristine (a, b, c) Si, (d, e, f) SNO1 and (g, h, i) SNO3 electrodes after cycling

**Table S1.** Comparison of the silicon composites for their electrochemical performance

| No | Current density (mA $g^{-1}$ /C rate) | Capacity mA $h g^{-1}$ | Material                               | Reference                                |
|----|---------------------------------------|------------------------|----------------------------------------|------------------------------------------|
| 1  | 50                                    | 842.59                 | NiO@Si                                 | ACS Appl. Mater. Interfaces <sup>1</sup> |
| 2  | 100                                   | 1200                   | SiO <sub>2</sub> @NiO                  | RSC Adv <sup>2</sup>                     |
| 3  | 0.1C                                  | 2849                   | Ni-Li <sub>2</sub> O@Si                | RSC Adv <sup>3</sup>                     |
| 4  | 100                                   | 700                    | Ni/SiO <sub>2</sub>                    | Adv. Funct. Mater <sup>4</sup>           |
| 5  | 750                                   | 1911                   | Fe <sub>2</sub> O <sub>3</sub> -Si     | JMCA                                     |
| 6  | 100                                   | 985                    | Si/Ti <sub>2</sub> O <sub>3</sub> /rGO | ACS Appl. Mater. Interfaces <sup>5</sup> |
| 7  | 50                                    | 1681                   | Si-G                                   | ACS Appl. Mater. Interfaces <sup>6</sup> |
| 8  | 1/10 C                                | 1074                   | Silicon@C                              | Angewandte Chemie <sup>7</sup>           |
| 9  | 100                                   | 828                    | Si/C Yolk/Shell                        | JMCA <sup>8</sup>                        |
| 10 | 200                                   | 832                    | Si @ Graphite/carbon                   | Sustainable Energy & Fuels <sup>9</sup>  |
| 11 | 1C                                    | 1565                   | Si@void@C                              | ChemElectroChem <sup>10</sup>            |
| 12 | 100                                   | 774.1                  | Tin-Oxide/Silicon                      | Chemistry select <sup>11</sup>           |
| 13 | 20                                    | 2162                   | Si@NiO                                 | Present work                             |

## References

1. M. C. Qiu, L. W. Yang, X. Qi, J. Li and J. X. Zhong, *ACS Applied Materials & Interfaces*, 2010, **2**, 3614-3618.
2. Y. Wang, W. Zhou, L. Zhang, G. Song and S. Cheng, *RSC Advances*, 2015, **5**, 63012-63016.
3. S. Wu, N. Du, H. Wu, C. Xiao, W. Zhao and D. Yang, *RSC Advances*, 2016, **6**, 109649-109656.
4. C. Tang, Y. Liu, C. Xu, J. Zhu, X. Wei, L. Zhou, L. He, W. Yang and L. Mai, *Advanced Functional Materials*, 2018, **28**, 1704561.
5. A. R. Park, D.-Y. Son, J. S. Kim, J. Y. Lee, N.-G. Park, J. Park, J. K. Lee and P. J. Yoo, *ACS Applied Materials & Interfaces*, 2015, **7**, 18483-18490.
6. S. Huang, L.-Z. Cheong, D. Wang and C. Shen, *ACS Applied Materials & Interfaces*, 2017, **9**, 23672-23678.
7. H. Su, A. A. Barragan, L. Geng, D. Long, L. Ling, K. N. Bozhilov, L. Mangolini and J. Guo, *Angewandte Chemie International Edition*, 2017, **56**, 10780-10785.
8. X. Huang, X. Sui, H. Yang, R. Ren, Y. Wu, X. Guo and J. Chen, *Journal of Materials Chemistry A*, 2018, **6**, 2593-2599.
9. W. Liu, Y. Zhong, S. Yang, S. Zhang, X. Yu, H. Wang, Q. Li, J. Li, X. Cai and Y. Fang, *Sustainable Energy & Fuels*, 2018, **2**, 679-687.
10. X. Ma, Y. Gao, M. Chen and L. Wu, *ChemElectroChem*, 2017, **4**, 1463-1469.
11. D. Jia, X. Li and J. Huang, *ChemistrySelect*, 2017, **2**, 5667-5676.
